# Supplementary material for: Ladder-type phenazine-linked covalent organic polymers with synergistic cation–π interactions for highly stable lithium metal batteries
Source: Royal Society of Chemistry journal article supplement (doi:10.1039/d5sc06777d), 2025-01-01
Supplement: d5sc06777d1.pdf [file d5sc06777d1.pdf]

## Supporting Information

### **Ladder-Type Phenazine-Linked Covalent Organic Polymers with Synergistic Cation- $\pi$ Interactions for Highly Stable Lithium Metal Batteries**

Xiao-Meng Lu,<sup>‡</sup> Haichao Wang,<sup>‡</sup> Yiwen Sun, Yi Xu, Yang Wu, Weiwei Sun, Chao Yang, Yifan Zhang, and Yong Wang \*

Department of Chemical Engineering, School of Environmental and Chemical Engineering, Shanghai University, 99 Shangda Road, Shanghai 200444, People's Republic of China

<sup>‡</sup>These authors contributed equally to this work.

\*Corresponding authors: Tel: +86-21-66137723; fax: +86-21-66136116.

Email address: yongwang@shu.edu.cn (Y. Wang).

## Experimental Section

Materials: Cyclohexanone octahydrate (CHH-M, 99%) and 1,2-Phenylenediamine (PD-M, 99%) was purchased from Aladdin. 2,3,7,8-Phenazinetetramine, hydrochloride (2:3) (PT-M, 97%) were purchased from Henan Psai Chemical Products Co., Ltd. Methanol ( $\text{CH}_3\text{OH}$ , abbreviated as MeOH, >99.5%), ethyl alcohol ( $\text{C}_2\text{H}_5\text{OH}$ , abbreviated as EtOH, >99.7%), acetone ( $\text{C}_3\text{H}_6\text{O}$ , abbreviated as AC,  $\geq 99.5\%$ ), acetic acid ( $\text{C}_2\text{H}_4\text{O}_2$ , abbreviated as AcOH,  $\geq 99.0\%$ ), tetrahydrofuran ( $\text{C}_4\text{H}_8\text{O}$ , abbreviated as THF,  $\geq 99.0\%$ ), 1,4-dioxane ( $\text{C}_4\text{H}_8\text{O}_2$ , abbreviated as 1,4-Diox,  $\geq 99.5\%$ ), 1,2,4-Trimethylbenzene ( $\text{C}_9\text{H}_{12}$ , abbreviated as TMB,  $\geq 98.0\%$ ), and N-Methylpyrrolidone ( $\text{C}_5\text{H}_9\text{NO}$ , abbreviated as NMP,  $\geq 99.0\%$ ) were obtained from Sinopharm Chemical Reagent Co., Ltd. All relevant starting materials, solvents were purchased from a commercial source and used without further purification.

Preparation of PZ-CHPD: A mixture of 780 mg of CHH-M and 870 mg of PD-M was prepared in a 250 mL round-bottom flask with 50 mL of anhydrous MeOH. The round-bottom flask was then heated in an oil bath at 105 °C for 8 h. Once cooled to room temperature, the precipitate was collected by centrifugation and washed repeatedly with EtOH, AC, and THF. The product was then dried overnight under vacuum at 60 °C.

Preparation of PZ-CHPT: A mixture of 31.2 mg of CHH-M, 57.4 mg of PT-M, 3 mL of TMB, 3 mL of 1,4-Diox, and 0.6 mL of a 6 M AcOH solution was prepared in a

10 mL Pyrex tube and sonicated for 10 min. The tube was initially evacuated, then filled with Ar gas, and this process was repeated 3 times. The tube was then heated in an oven at 150 °C for 4 days. After cooling to room temperature, the precipitate was collected by centrifugation and washed with EtOH, AC, and THF. The product was then dried under vacuum at 60 °C overnight.

Preparation of Li@PZ-CHPT: 1 mg of PZ-CHPT powder was dispersed in 1 mL of NMP and subjected to ultrasonication for 30 minutes to produce a 1 mg mL<sup>-1</sup> PZ-CHPT@NMP suspension. Then, 30 µL of the PZ-CHPT@NMP suspension was applied onto a 12 mm diameter Li foil. Finally, the Li foils were dried under vacuum at room temperature in a glove box to obtain Li@PZ-CHPT.

Preparation of Cu@PZ-CHPT: The PZ-CHPT was mixed with PVDF in a 9:1 weight ratio in the NMP solution. The thoroughly mixed slurry was applied to a 12 mm diameter copper (Cu) foil. The Cu@PZ-CHPT electrodes were prepared by drying overnight at 60 °C under vacuum.

Preparation of LiFePO<sub>4</sub> (LFP) cathode: For LFP cathode fabrication, commercial LFP powder was combined with Super P carbon and PVDF in a weight ratio of 8:1:1, using NMP as the solvent. The slurry was then applied to a 12 mm diameter Al foil and dried in a vacuum oven at 60 °C for 12 h, achieving an average mass loading of 2-4 mg cm<sup>-2</sup>.

Characterization: Scanning electron microscopy (SEM, Hitachi SU1510) and transmission electron microscopy (TEM, Hitachi HT7820), along with corresponding elemental distribution analysis, were employed to examine the morphology of PZ-CHPT and PZ-CHPD. To evaluate the structure and phase of PZ-CHPT and PZ-CHPD, X-ray diffraction (XRD) measurements were conducted on a Bruker D8 Advance diffractometer, with a voltage of 40 kV and a current of 40 mA. Fourier transform infrared (FT-IR) spectra of PZ-CHPT and PZ-CHPD were obtained with a Nicolet 380 FT-IR spectrometer. Raman spectra (Raman, Renishaw in via Plus) were employed to study the organic groups in the two phenazine-based COPs. The chemical state of surface compositions of PZ-CHPT and PZ-CHPD was performed using a Thermo Scientific™ K-Alpha™ spectrometer. Thermogravimetric analysis (TGA, NETZSCH TG 209 F1 Libra) was conducted in an N<sub>2</sub> atmosphere at a heating rate of 10 °C min<sup>-1</sup> to assess the stability of the two phenazine-based COPs. The commercial Bruker Multimode 8 with Nanoscope V controller was implemented in the PeakForce Quantitative Nano-Mechanics mode for performing Atomic Force Microscope (AFM, Dimension Icon) investigations. BET surface areas were determined using a Micromeritics ASAP 2020M+C analyzer and N<sub>2</sub> adsorption/desorption isotherms obtained at 77 K. *In situ* optical image (OM) investigations were carried out using the Zeiss Smartzoom 5.

Electrochemical measurements: The asymmetric, symmetric cells of Li||PZ-

CHPD@Cu and Li@CHPT||Li@CHPT were fabricated using CR2032 coin cells, a commercial Clegard 2400 polypropylene separator, and 40  $\mu\text{L}$  of a 1.0 M LiTFSI solution in a 1:1 (v/v) mixture of DOL and DME, with 0.2 M LiNO<sub>3</sub> added as the electrolyte. Meanwhile, the full cells of Li@PZ-CHPT|LFP used 40  $\mu\text{L}$  of a 1 M LiPF<sub>6</sub> solution in EC/DEC (1:1 w/w) as the electrolyte. The voltage range of the full cells was set between 2.5 and 4.2 V at different current densities. The cyclic electrochemical tests were carried out on a Land CT2001A electrochemical testing system. The electrochemical impedance spectra of Li@CHPT||Li@CHPT symmetric cells, with frequencies ranging from 100 kHz to 0.01 Hz, were recorded using a CHI660E Electrochemical Workstation (Shanghai Chenhua Instrument).

Theoretical calculation: For all calculations in this work, density functional theory (DFT) was applied using the DMOL<sup>3</sup> code in Materials Studio.<sup>1</sup> The calculations were carried out within the framework of density functional theory using the Perdew-Burke-Ernzerhof (PBE) functional, based on the generalized gradient approximation (GGA).<sup>2</sup> To account for relativistic effects, the All-Electron Relativistic approach was employed, which considers all electrons and integrates relativistic effects into the core.<sup>3</sup> The double numerical atomic orbital basis set, augmented with a polarization function (DNP), was selected. For the geometry structural optimization, the convergence criteria for energy, maximum force, and displacement were specified at ‘fine’ quality, with values of  $1 \times 10^{-5}$  Ha,  $2 \times 10^{-3}$  Ha/Å, and  $5 \times 10^{-3}$  Å, respectively.

For the pair PZ-CHPT and Li<sup>+</sup>, the adsorption energy is calculated using the

equation provided below:

$E_{\text{abs}} = E_{\text{Li+PZ-CHPT}} - E_{\text{PZ-CHPT}} - E_{\text{Li}}$ , where  $E_{\text{Li+PZ-CHPT}}$ ,  $E_{\text{PZ-CHPT}}$ , and  $E_{\text{Li}}$  refer to the optimized energies of the PZ-CHPT with an adsorbed Li atom, PZ-CHPT segment model, and isolated Li atom, respectively.

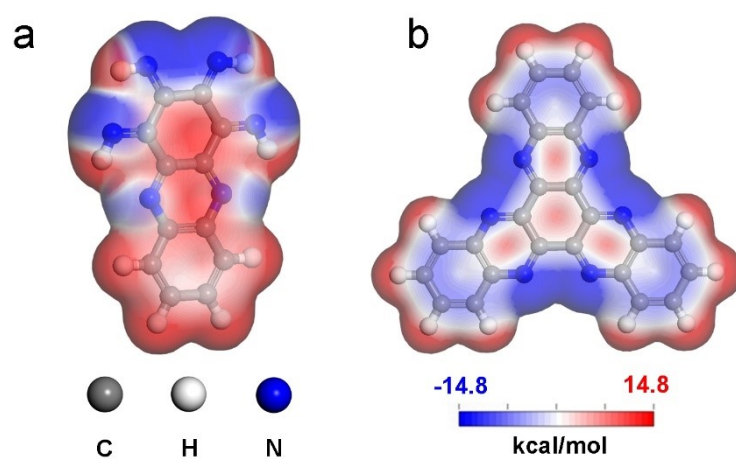

**Fig. S1** Simulated ESP distribution of (a) PZ-CHPD and (b) PZ-CHPT. Notes: blue represents the electronegative regions, while red indicates the electropositive regions.

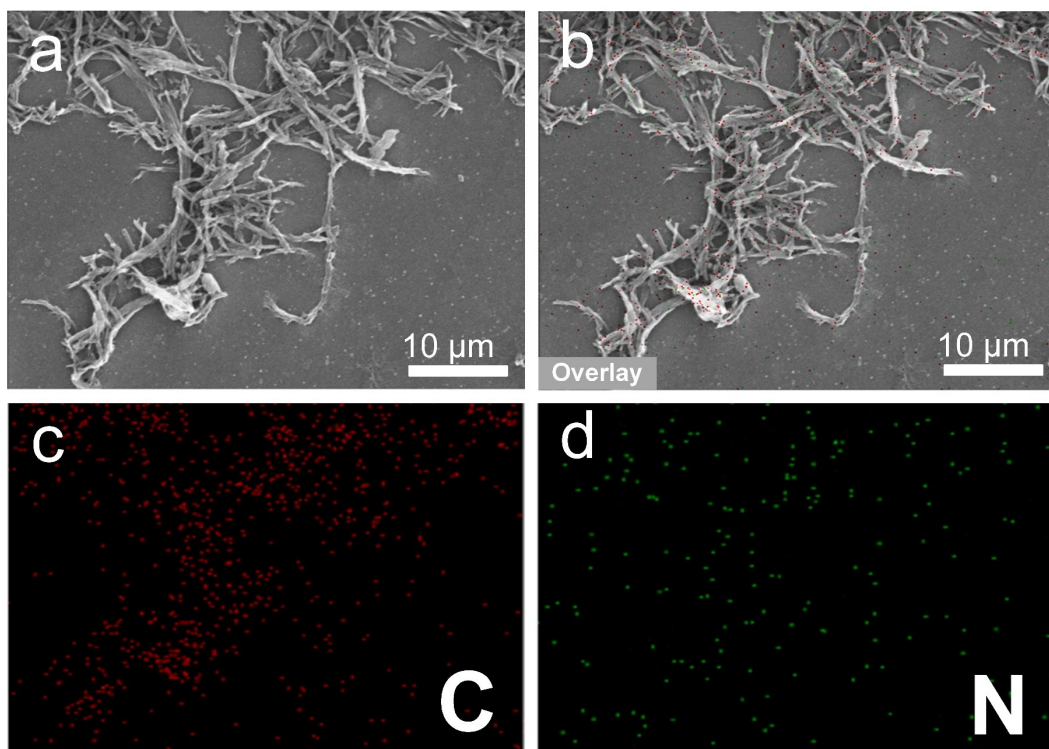

**Fig. S2** (a) SEM and (b-d) EDS images of PZ-CHPD.



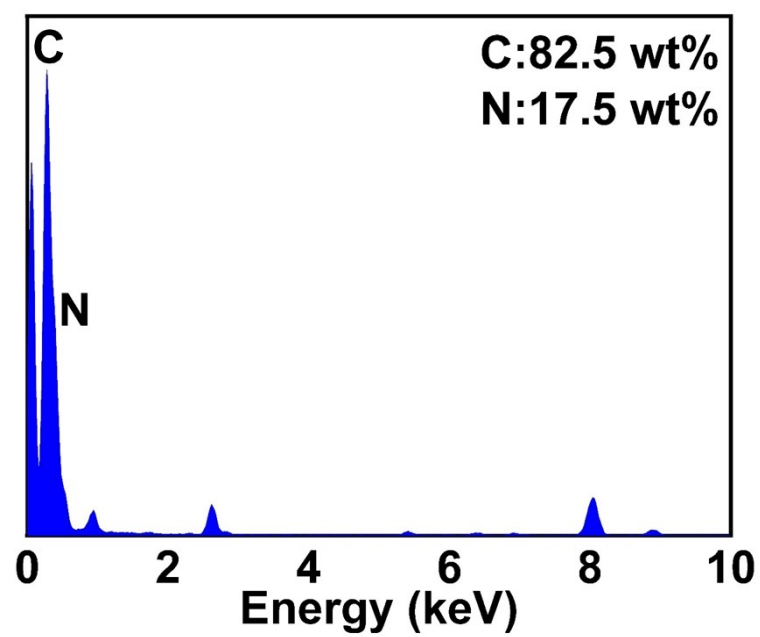

Fig. S3 EDX patterns of PZ-CHPT.

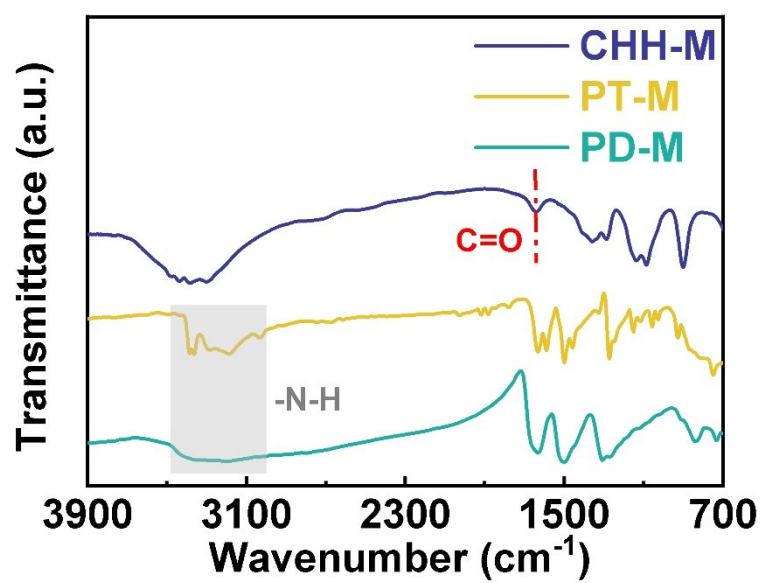

**Fig. S4** FT-IR spectra of CHH-M, PT-M and PD-M monomers.

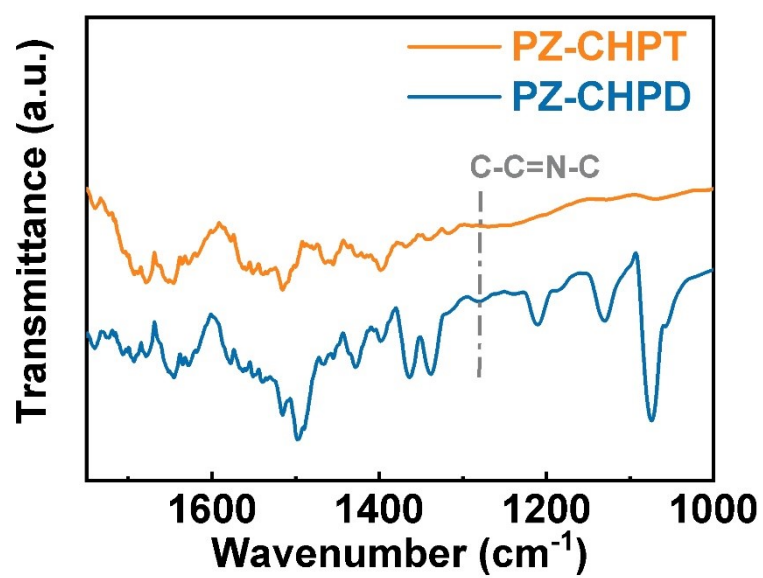

Fig. S5 FT-IR spectra of PZ-CHPT and PZ-CHPD products.

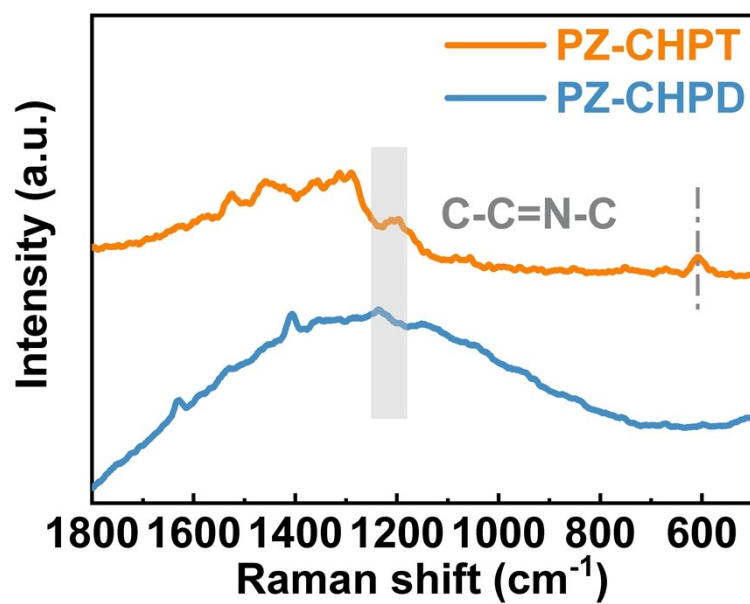

Fig. S6 Raman spectra of PZ-CHPT and PZ-CHPD products.

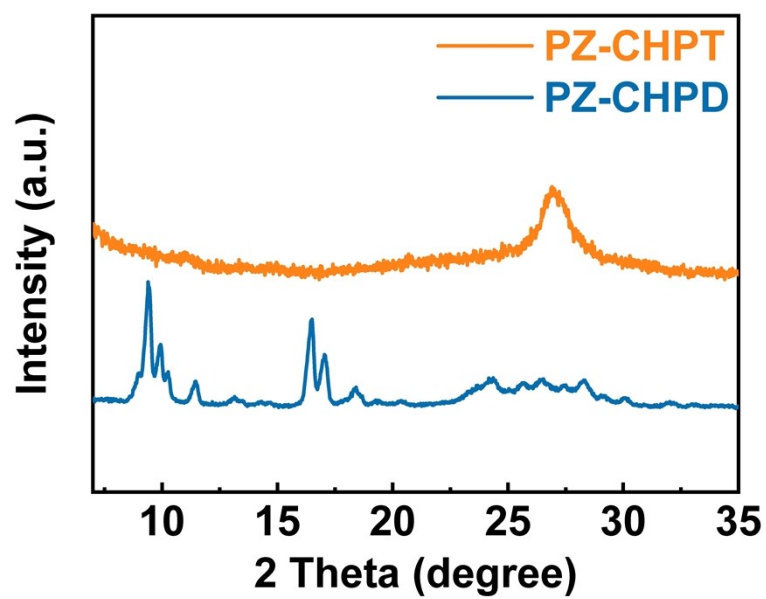

**Fig. S7** PXRD patterns of the synthesized PZ-CHPT and PZ-CHPD. The pattern demonstrates the short-range ordering of PZ-CHPT.

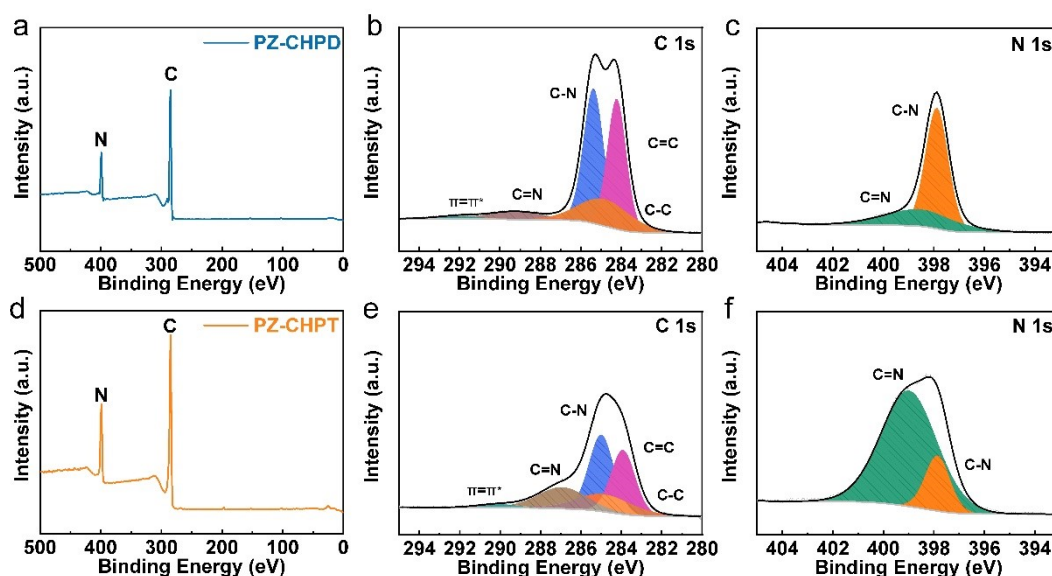

**Fig. S8** XPS survey spectra of (a) PZ-CHPD, (d) PZ-CHPT. High-resolution XPS spectra of C 1s for (b) PZ-CHPD, (e) PZ-CHPT. High-resolution XPS spectra of N 1s for (c) PZ-CHPD, (f) PZ-CHPT. As shown in Figure S7a and S7d, the XPS survey spectra show that both the phenazine-based products exhibited two peaks corresponding to C and N elements. The high-resolution C 1s spectrum shown in Figure S7b and S7e, peaks at 286.8, 285.4, 284.8 and 283.8 eV are associated with C=N, C-N, C-C and C=C signals, respectively.<sup>4</sup> Similarly, in the high-resolution N 1s spectrum (Figure S7c and S7f), the peaks at 399.9 eV and 398.6 eV are associated with C–N and C=N signals, respectively.<sup>5</sup>

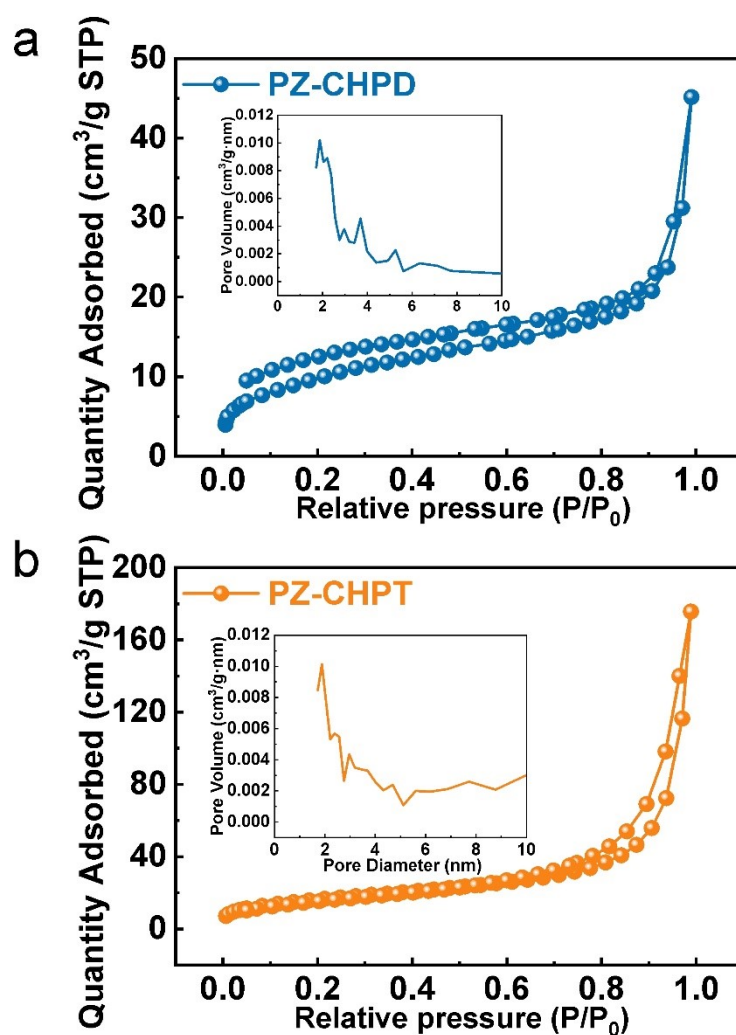

**Fig. S9** N<sub>2</sub> adsorption–desorption isotherm and inset revealing pore size distributions of (a) PZ-CHPD and (b) PZ-CHPT. Based on the N<sub>2</sub> adsorption isotherm, PZ-CHPD and PZ-CHPT have average pore sizes of 7.72 nm and 18.35 nm, respectively.

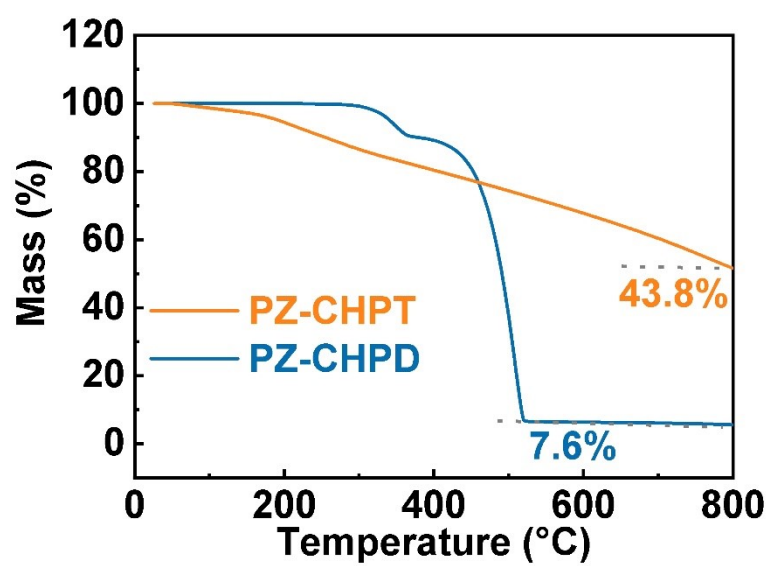

**Fig. S10** TGA curves of PZ-CHPD and PZ-CHPT products in N<sub>2</sub> atmosphere with the heating rate of 10 °C min<sup>-1</sup>.



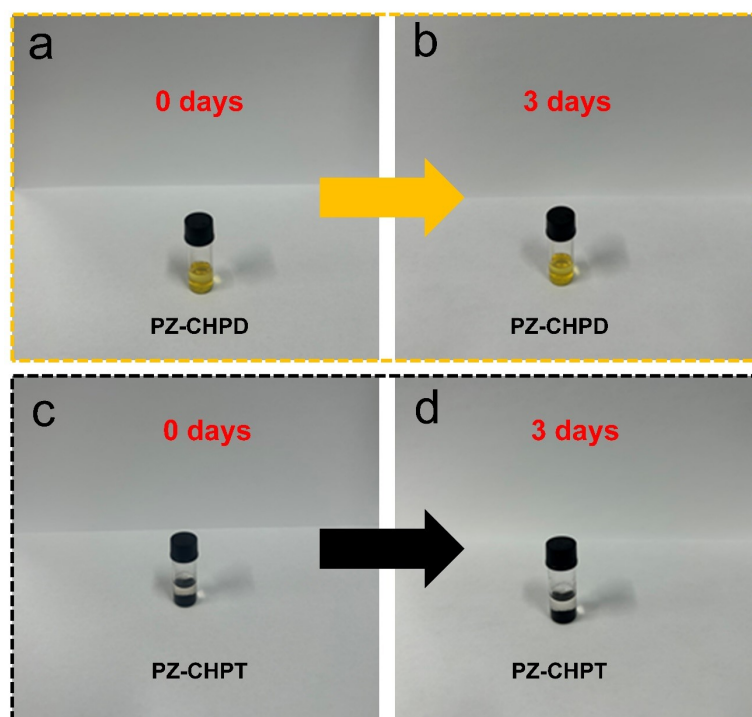

**Fig. S11** Solubility of the PZ-CHPD sample in the electrolyte for (a) 0 day and (b) 3 days. Solubility of the PZ-CHPT sample in the electrolyte for (c) 0 day and (d) 3 days.

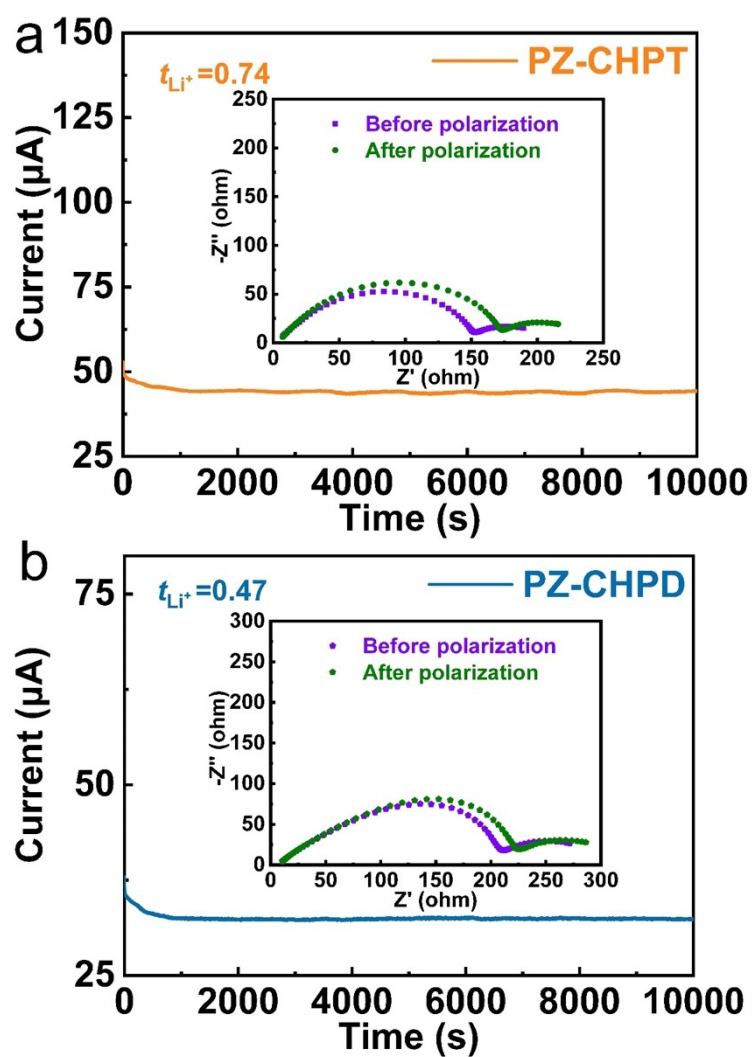

**Fig. S12** Polarization curve and impedance diagram of symmetric cells before and after polarization (constant potential: 10 mV) for (a) Li@PZ-CHPT||Li@PZ-CHPT and (b) Li@PZ-CHPD||Li@PZ-CHPD.

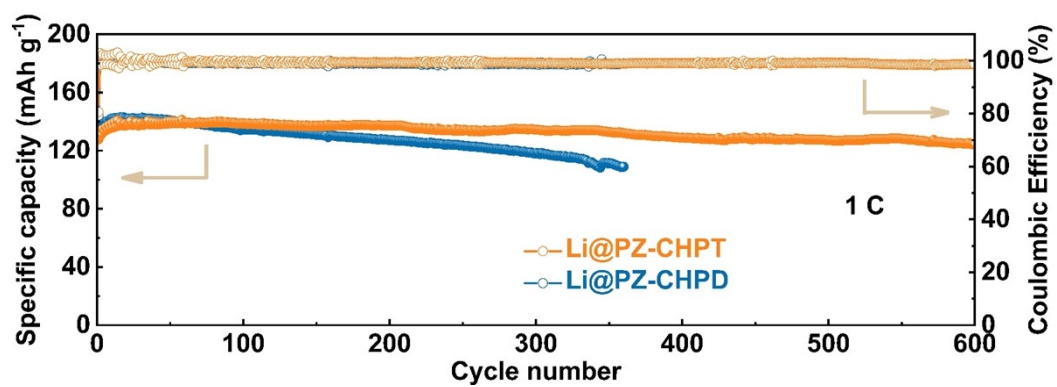

**Fig. S13** Cycling performance of Li@PZ-CHPT||LFP and Li@PZ-CHPD||LFP full batteries at 1 C.

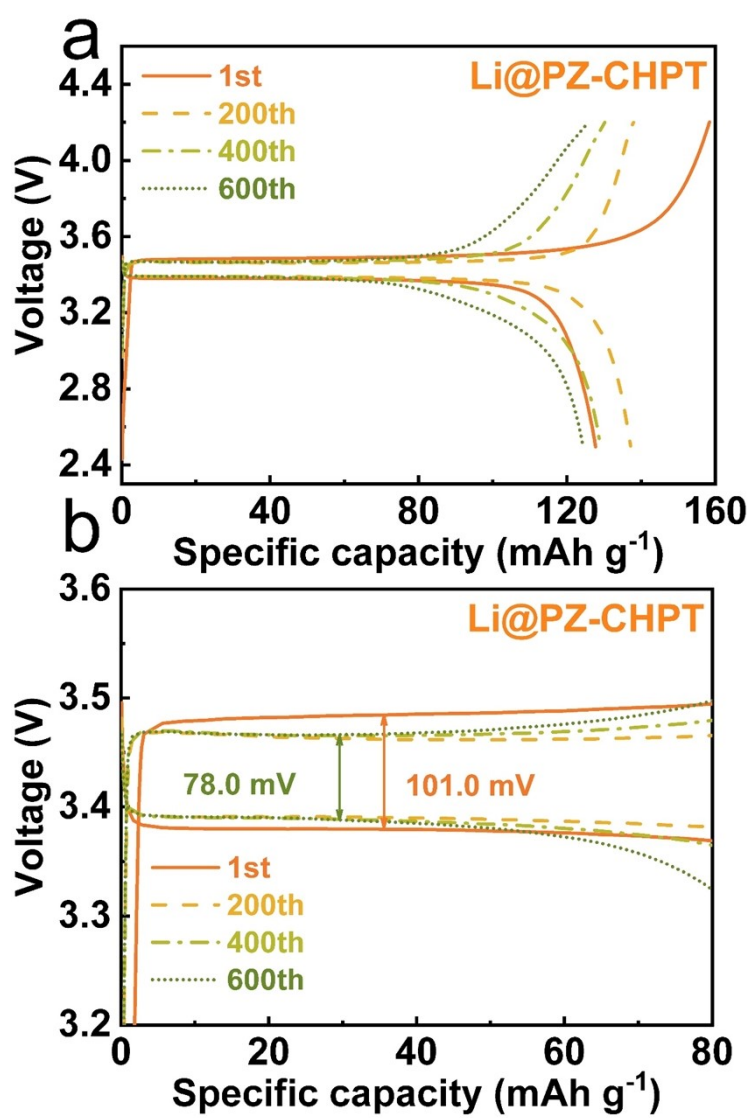

**Fig. S14** (a, b) Galvanostatic charge-discharge curves of Li@PZ-CHPT||LFP full cells at 1 C.

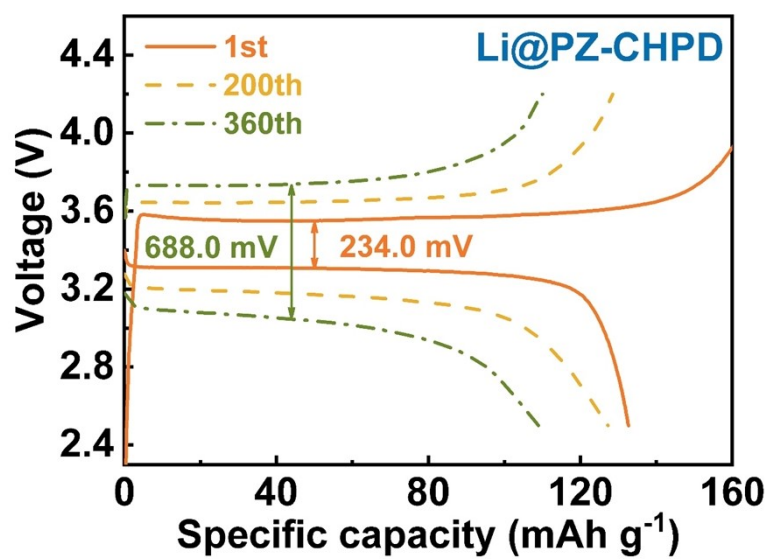

**Fig. S15** Galvanostatic charge–discharge curves of Li@PZ-CHPD||LFP full cells at 1 C.

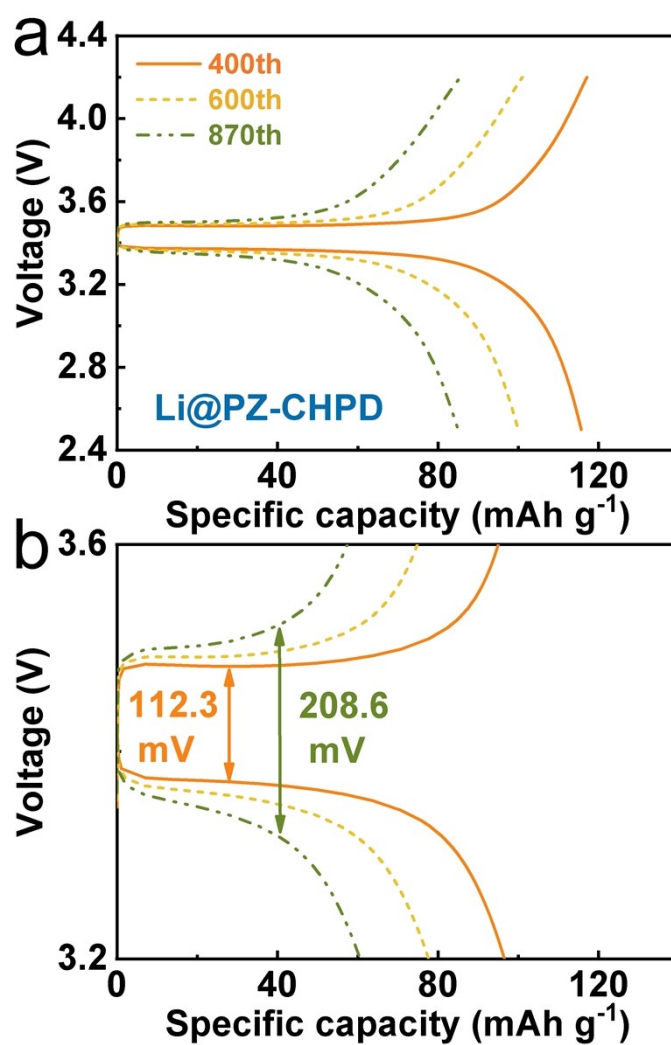

**Fig. S16** Galvanostatic charge–discharge curves of Li@PZ-CHPD||LFP full cells at 3 C.

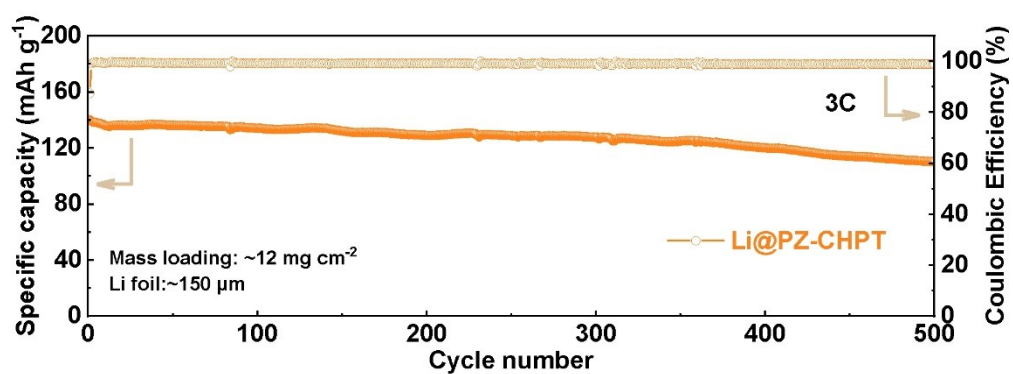

**Fig. S17** Cycling performance of Li@PZ-CHPT||LFP full cells with high-loading cathode ( $\sim 12 \text{ mg cm}^{-2}$ ) and thin Li foil ( $\sim 150 \text{ }\mu\text{m}$ ) at 3 C.

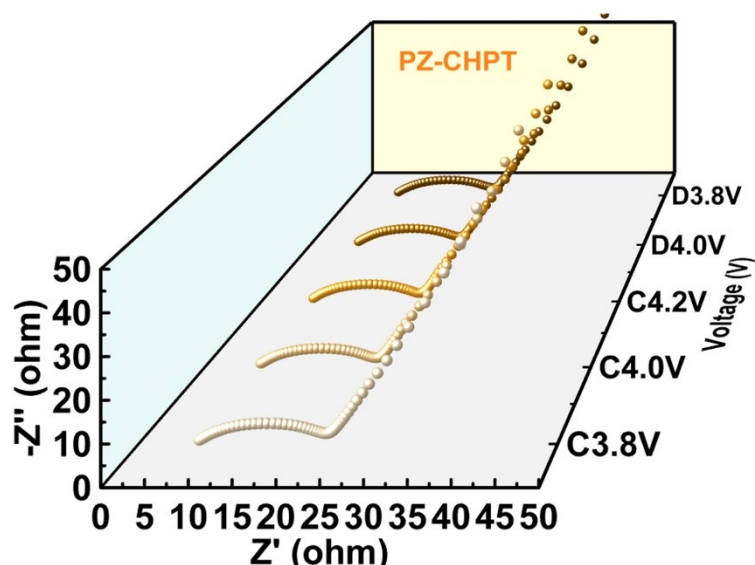

**Fig. S18** EIS of Li@PZ-CHPT||LFP full cells at different states of charge. The interfacial impedance plays a key role in regulating Li flux; The increased impedance can impair ion conductivity, enhance electron tunneling and result in Li metal accumulation at the interface, promoting dendrite growth and the formation of dead Li.<sup>4</sup> The minimal changes observed during cycling indicate intimate contact between the interlayer and electrolyte, as well as enhanced interfacial compatibility. It has been determined that the charge transfer resistance ( $R_{ct}$ ) in the low-frequency range reflects the  $\text{Li}^+$  solvation and desolvation dynamics, while the high-frequency range is associated with the impedance of the SEI ( $R_{SEI}$ ).<sup>5</sup> The  $R_{SEI}$  values remain consistent throughout the cycling in the high-frequency region, indicating the absence of dead Li and the stability of the SEI, which ensures the steady operation of the Li@PZ-CHPT||LFP full cell.



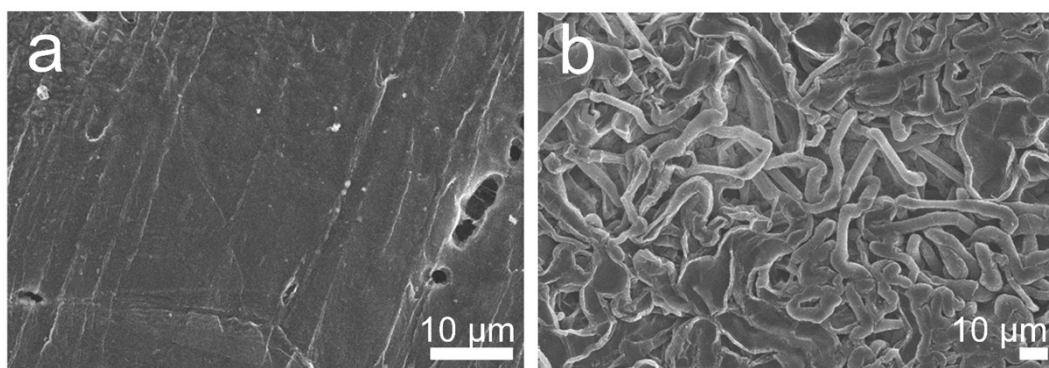

**Fig. S19** Plane SEM scans of bare Li after (a) the 1st cycle and (b) the 100th cycle.

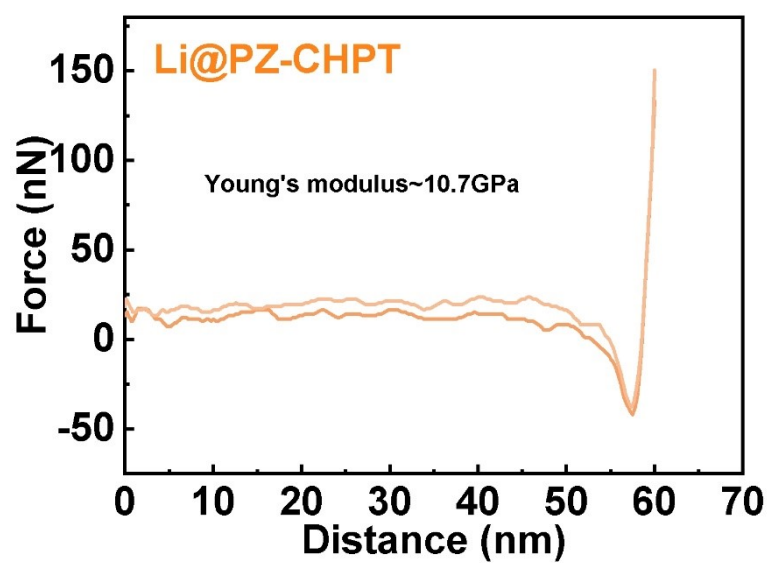

Fig. S20 AFM nanoindentation testing of PZ-CHPT@Li.

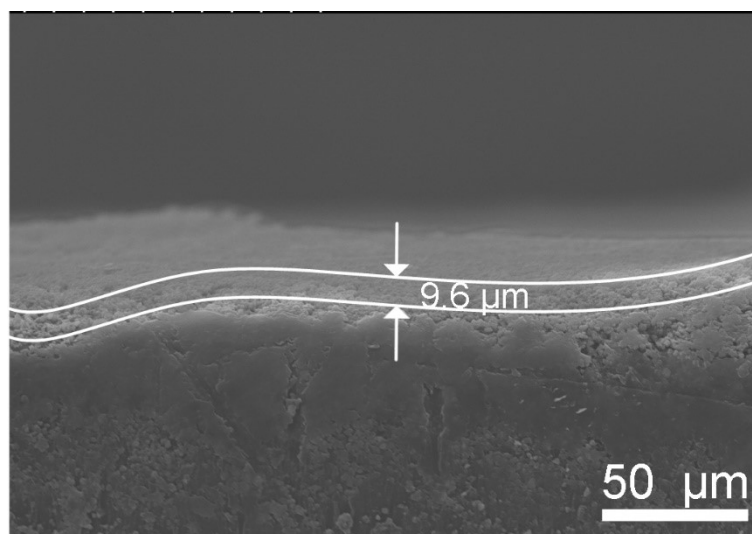

**Fig. S21** Cross-sectional morphologies of Li@PZ-CHPT. Previous studies on covalent organic polymer-based artificial SEI layers have indicated that an optimal thickness generally lies within the range of 8–16  $\mu\text{m}$ .<sup>6</sup> This range is recognized to balance satisfactory mechanical robustness for dendrite suppression with low ionic transport resistance.

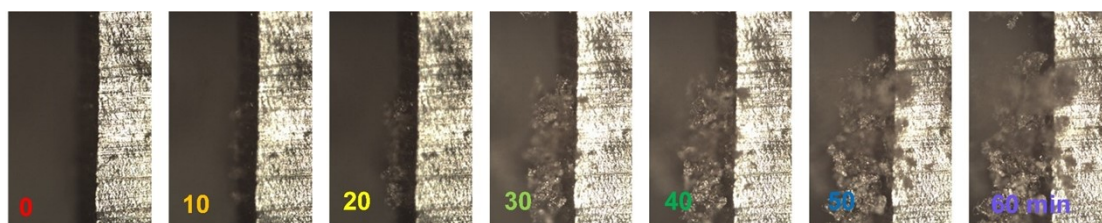

**Fig. S22** *In-situ* OM images of Li deposition on bare Li.

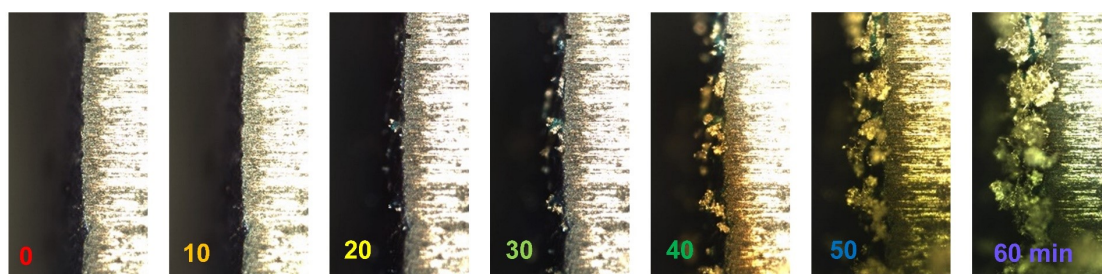

**Fig. S23** *In-situ* OM images of Li deposition on Li@PZ-CHPD.

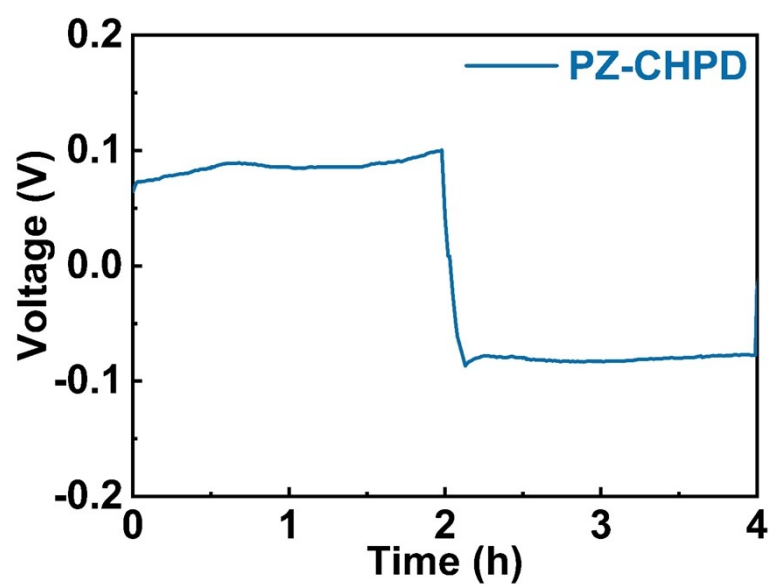

**Fig. S24** Time-voltage plot of Li||Li symmetric battery based on PZ-CHPD.

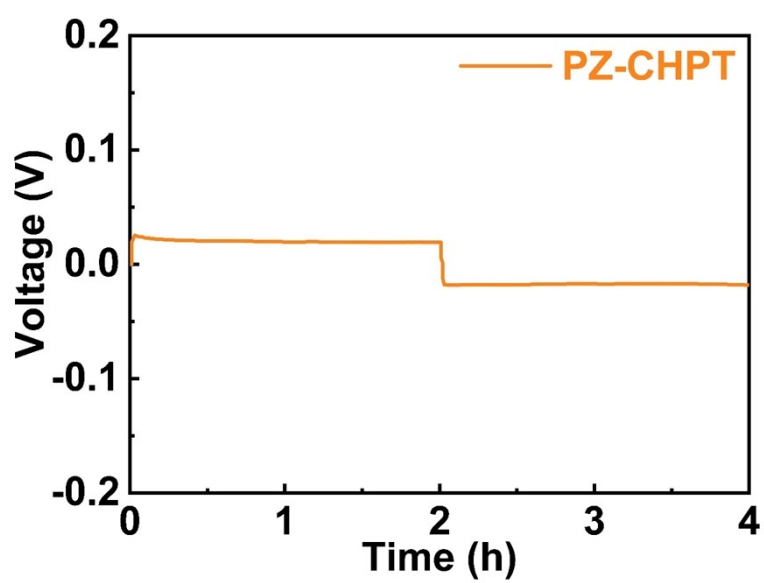

**Fig. S25** Time-voltage plot of Li||Li symmetric battery based on PZ-CHPT.

Table S1. Comparison of plating/stripping life between this work and previous works of COFs.

| Material                | Potential Hysteresis (mV) | Current/ Capacity Density (mA cm <sup>-2</sup> , mAh cm <sup>-2</sup> ) | Cycling Lifespan (h) | Ref              |
|-------------------------|---------------------------|-------------------------------------------------------------------------|----------------------|------------------|
| <b>PZ-CHPT</b>          | <b>23.5</b>               | <b>3, 1</b>                                                             | <b>3200</b>          | <b>This work</b> |
|                         | <b>32.4</b>               | <b>5, 1</b>                                                             | <b>2800</b>          | <b>This work</b> |
|                         | <b>43.8</b>               | <b>10, 1</b>                                                            | <b>1300</b>          | <b>This work</b> |
| BDTFP-COF               | 24.9                      | 1, 1                                                                    | 300                  | 7                |
| TpTG COF                | 11.0                      | 1, 1                                                                    | 1800                 | 8                |
| TpBpy-COF               | ~20.0                     | 1, 1                                                                    | 600                  | 9                |
| COF <sub>TAPB-PDA</sub> | ~32                       | 1, 1                                                                    | 400                  | 10               |
| S-COF                   | 20.2                      | 4, 2                                                                    | 2400                 | 11               |
| HS-POP                  | <30.0                     | 0.5, 1                                                                  | 2400                 | 12               |
| PA-COF                  | 15.0                      | 5, 5                                                                    | 1000                 | 13               |
| HAHATN-PMDA-COF         | 15.0                      | 0.5, 1                                                                  | 600                  | 14               |
| G@COF-1                 | ~30.0                     | 1, 1                                                                    | 300                  | 15               |
| ACOF                    | 66.0                      | 1, 1                                                                    | 600                  | 16               |
| AQ-Si-COFs              | 15.0                      | 0.015, 0.015                                                            | 1000                 | 17               |
| COF TpTt                | 14.0                      | 1, 1                                                                    | 2450                 | 18               |
| CTF-LiI                 | ~80.0                     | 1, 1                                                                    | 1400                 | 19               |
| DCP-CTF                 | 25.0                      | 1, 1                                                                    | 2000                 | 20               |
| ivCOF-FSI               | 30.0                      | 2, 2                                                                    | 400                  | 21               |



## REFERENCES

1. B. Delley, From Molecules to Solids with the DMol<sup>3</sup> Approach, *J. Chem. Phys.*, 2000, **113**, 7756-7764.
2. J. P. Perdew, K. Burke and M. Ernzerhof, Generalized Gradient Approximation Made Simple, *Phys. Rev. Lett.*, 1996, **77**, 3865-3868.
3. S. Grimme, Semiempirical GGA-Type Density Functional Constructed with A Long-Range Dispersion Correction, *J. Comput. Chem.*, 2006, **27**, 1787-1799.
4. X. Zhang, S. Wang, C. Xue, C. Xin, Y. Lin, Y. Shen, L. Li and C.-W. Nan, Self-Suppression of Lithium Dendrite in All-Solid-State Lithium Metal Batteries with Poly(vinylidene difluoride)-Based Solid Electrolytes, *Adv. Mater.*, 2019, **31**, 1806082.
5. B. Ma, H. Zhang, R. Li, S. Zhang, L. Chen, T. Zhou, J. Wang, R. Zhang, S. Ding, X. Xiao, T. Deng, L. Chen and X. Fan, Molecular-docking electrolytes enable high-voltage lithium battery chemistries, *Nat. Chem.*, 2024, **16**, 1427-1435.
6. X. M. Lu, Y. N. Cao, Y. Sun, H. C. Wang, W. W. Sun, Y. Xu, Y. Wu, C. Yang and Y. Wang, sp-Carbon-Conjugated Organic Polymer as Multifunctional Interfacial Layers for Ultra-Long Dendrite-Free Lithium Metal Batteries, *Angew. Chem. Int. Ed.*, 2024, **63**, e202320259.
7. X. Y. Ni, J. Liu, H. Q. Ji, L. B. Chen, T. Qian and C. L. Yan, Ordered Lithium Ion Channels of Covalent Organic Frameworks with Lithiophilic Groups Enable Uniform and Efficient Li Plating/Stripping, *J. Energy Chem.*, 2021, **61**, 135-140.
8. Y. R. Zhang, W. B. Wang, M. L. Hou, Y. T. Zhang, Y. Y. Dou, Z. H. Yang, X. Y. Xu, H. N. Liu and S. L. Qiao, Self-Exfoliated Covalent Organic Framework Nano-Mesh Enabled Regular Distribution for Stable Lithium Metal, *Energy Storage Mater.*, 2022, **47**, 376-385.
9. K. S. Oh, S. Park, J. S. Kim, Y. Yao, J. H. Kim, J. Guo, D. H. Seo and S. Y. Lee, Electrostatic Covalent Organic Frameworks as On-Demand Molecular Traps for High-Energy Li Metal Battery Electrodes, *ACS Energy Lett.*, 2023, **8**, 2463-2474.
10. D. D. Chen, S. Huang, L. Zhong, S. J. Wang, M. Xiao, D. M. Han and Y. Z. Meng, In Situ Preparation of Thin and Rigid COF Film on Li Anode as Artificial Solid Electrolyte Interphase Layer Resisting Li Dendrite Puncture, *Adv. Funct. Mater.*, 2020, **30**, 1907717.
11. W. B. Wang, Z. H. Yang, Y. T. Zhang, A. P. Wang, Y. R. Zhang, L. L. Chen, Q. Li and S. L. Qiao, Highly Stable Lithium Metal Anode Enabled by Lithiophilic and Spatial-Confined Spherical-Covalent Organic Framework, *Energy Storage Mater.*, 2022, **46**, 374-383.
12. Y. T. Zhang, Z. H. Yang, Y. Y. Dou, W. B. Wang, Y. R. Zhang, A. P. Wang, X. J. Zhang, X. M. Guo and S. L. Qiao, Hollow Spherical Organic Polymer Artificial Layer Enabled Stable Li Metal Anode, *Chem. Eng. J.*, 2022, **442**, 136155.
13. G. H. Li, Y. Yang, J. C. Cai, T. Wen, L. C. Zhuang, X. Y. Huang, Y. P. Cai and X. J. Hong, Lithiophilic Aromatic Sites and Porosity of COFs for a Stable Lithium Metal Anode, *ACS Appl. Energy Mater.*, 2022, **5**, 13554-13561.
14. X. Y. Wu, S. Q. Zhang, X. Y. Xu, F. X. Wen, H. W. Wang, H. Z. Chen, X. L. Fan

- and N. Huang, Lithiophilic Covalent Organic Framework as Anode Coating for High-Performance Lithium Metal Batteries, *Angew. Chem. Int. Ed.*, 2024, **63**, e202319355.
15. Y. W. Song, P. Shi, B. Q. Li, X. Chen, C. X. Zhao, W. J. Chen, X. Q. Zhang, X. Chen and Q. Zhang, Covalent Organic Frameworks Construct Precise Lithiophilic Sites for Uniform Lithium Deposition, *Matter*, 2021, **4**, 253-264.
  16. X. R. Li, Y. Tian, L. Shen, Z. B. Qu, T. Q. Ma, F. Sun, X. Y. Liu, C. Zhang, J. Q. Shen, X. Y. Li, L. N. Gao, S. X. Xiao, T. F. Liu, Y. Liu and Y. F. Lu, Electrolyte Interphase Built from Anionic Covalent Organic Frameworks for Lithium Dendrite Suppression, *Adv. Funct. Mater.*, 2021, **31**, 2009718.
  17. C. Li, D. D. Wang, G. Ho, Z. Y. Zhang, J. Huang, K. T. Bang, C. Y. Lau, S. Y. Leu, Y. M. Wang and Y. Kim, Anthraquinone-Based Silicate Covalent Organic Frameworks as Solid Electrolyte Interphase for High-Performance Lithium-Metal Batteries, *J. Am. Chem. Soc.*, 2023, **145**, 24603-24614.
  18. Z. H. Li, W. Y. Ji, T. X. Wang, Y. R. Zhang, Z. Li, X. S. Ding, B. H. Han and W. Feng, Guiding Uniformly Distributed Li-Ion Flux by Lithiophilic Covalent Organic Framework Interlayers for High-Performance Lithium Metal Anodes, *ACS Appl. Mater. Interfaces*, 2021, **13**, 22586-22596.
  19. Y. X. Zheng, S. X. Xia, F. Dong, H. Sun, Y. P. Pang, J. H. Yang, Y. Z. Huang and S. Y. Zheng, High Performance Li Metal Anode Enabled by Robust Covalent Triazine Framework-Based Protective Layer, *Adv. Funct. Mater.*, 2021, **31**, 2006159.
  20. X. D. Li, Y. T. Zhang, Y. Y. Dou, Z. Y. Zhao, X. Y. Fan and H. C. Jiang, Nanoporous Triazine-Framework-Assembled Electrolyte Interphase Layer as a Lithiophilic Gridding for Uniform Lithium Deposition and Dendrite Inhibition, *ACS Applied Nano Mater.*, 2024, **7**, 2825-2835.
  21. W. F. Zhang, G. X. Jiang, W. W. Zou, L. H. Zhang, S. L. Li, S. G. Qi, X. J. Wang, Z. M. Cui, H. Y. Song, L. Du and Z. X. Liang, Ionic Covalent Organic Frameworks Triggered Efficient Synergy: Li Plus De-Solvation and the Formation of LiF-Rich Interphase, *J. Power Sources*, 2022, **548**, 232001.
